# Supplementary material
Source: PubMed Central journal article supplement (PMC6561346)
Supplement: NIHMS1524730-supplement-520_2018_4479_MOESM2_ESM.pdf [file NIHMS1524730-supplement-520_2018_4479_MOESM2_ESM.pdf]

| <b>Study #</b> | <b>Last name of first author</b> | <b>Year</b> | <b>Title</b>                                                                                                                                                                        |
|----------------|----------------------------------|-------------|-------------------------------------------------------------------------------------------------------------------------------------------------------------------------------------|
| 1              | Alibhai                          | 2015        | A phase II RCT and economic analysis of three exercise delivery methods in men with prostate cancer on androgen deprivation therapy                                                 |
| 2              | Arredondo                        | 2015        | Fe en Accion/Faith in Action: Design and implementation of a church-based randomized trial to promote physical activity and cancer screening among churchgoing Latinas              |
| 3              | Arsenault                        | 2016        | The Use of the Whole Primary-Care Team, Including Community Health Workers, to Achieve Success in Increasing Colon Cancer Screening Rate                                            |
| 4              | Baker                            | 2014        | Comparative Effectiveness of a Multifaceted Intervention to Improve Adherence to Annual Colorectal Cancer Screening in Community Health Centers A Randomized Clinical Trial         |
| 5              | Belkora                          | 2015        | Coaching patients in the use of decision and communication aids: RE-AIM evaluation of a patient support program                                                                     |
| 6              | Berger                           | 2015        | The Role of Community Education in Increasing Knowledge of Breast Health and Cancer: Findings from the Asian Breast Cancer Project in Boston, Massachusetts                         |
| 7              | Braun                            | 2015        | Reducing Cancer Screening Disparities in Medicare Beneficiaries Through Cancer Patient Navigation                                                                                   |
| 8              | Brenner                          | 2015        | Breast Cancer and the Environment: Reaching Multicultural Communities; Advocates Mentoring Advocates                                                                                |
| 9              | Brenner                          | 2014        | with usual care on colorectal cancer screening completion in vulnerable populations: study protocol for a randomized controlled trial                                               |
| 10             | Burhansstipanov                  | 2014        | Findings from the Native Navigators and the Cancer Continuum (NNACC) Study                                                                                                          |
| 11             | Cadmus-Bertram                   | 2016        | Randomized trial of a phone- and web-based weight loss program for women at elevated breast cancer risk: The HELP study                                                             |
| 12             | Carrasquillo                     | 2014        | Rationale and design of the research project of the South Florida Center for the Reduction of Cancer Health Disparities (SUCCESS): study protocol for a randomized controlled trial |
| 13             | Cartmell                         | 2016        | Patient participation in cancer clinical trials: A pilot test of lay navigation                                                                                                     |

|    |               |      |                                                                                                                                                        |
|----|---------------|------|--------------------------------------------------------------------------------------------------------------------------------------------------------|
| 14 | Ceballos      | 2015 | Design, development, and feasibility of a spanish-language cancer survivor support group                                                               |
| 15 | Chambers      | 2015 | A randomised controlled trial of a couples-based sexuality intervention for men with localised prostate cancer and their female partners               |
| 16 | Charlot       | 2015 | Impact of patient and navigator race and language concordance on care after cancer screening abnormalities                                             |
| 17 | Chowdhury     | 2015 | Feasibility study of case-finding for breast cancer by community health workers in rural Bangladesh                                                    |
| 18 | Chung         | 2015 | Increasing melanoma screening Hispanic/Latino Americans: A community-based educational intervention                                                    |
| 19 | Clair McClung | 2015 | Impact of navigation on knowledge and attitudes about clinical trials among Chinese patients undergoing treatment for breast and gynecological cancers |
| 20 | Coronado      | 2014 | Multi-level Intervention to increase participation in mammography screening: ¡Fortaleza Latina! study design                                           |
| 21 | Coronado      | 2016 | Multilevel intervention raises Latina participation in mammography screening: Findings from ¡Fortaleza Latina!                                         |
| 22 | Cuesta-Briand | 2015 | Connecting tracks: Exploring the roles of an Aboriginal women's cancer support network                                                                 |
| 23 | Drake         | 2015 | A Community-Based Partnership to Successfully Implement and Maintain a Breast Health Navigation Program                                                |
| 24 | Enard         | 2015 | Patient navigation to increase colorectal cancer screening among Latino Medicare enrollees: a randomized controlled trial                              |
| 25 | Fernandez     | 2015 | A randomized controlled trial of two interventions to increase colorectal cancer screening among Hispanics on the Texas-Mexico border                  |
| 26 | Fleisher      | 2016 | Lessons Learned from Implementing a Prostate Cancer Risk Assessment Program for Underserved High-Risk Men in the Community: the Prostate REACH Project |
| 27 | Fouad         | 2016 | Patient Navigation As a Model to Increase Participation of African Americans in Cancer Clinical Trials                                                 |

|    |             |      |                                                                                                                                                                |
|----|-------------|------|----------------------------------------------------------------------------------------------------------------------------------------------------------------|
| 28 | Gabitova    | 2014 | Improving healthcare empowerment through breast cancer patient navigation: a mixed methods evaluation in a safety-net setting                                  |
| 29 | Giese-Davis | 2016 | Peer-counseling for women newly diagnosed with breast cancer: A randomized community/research collaboration trial                                              |
| 30 | Hanson      | 2014 | Circles of Care: Implementation and Evaluation of Support Teams for African-Americans with Cancer                                                              |
| 31 | Herce       | 2015 | with HIV-associated Kaposi sarcoma treated with systemic chemotherapy and integrated antiretroviral therapy in rural Malawi                                    |
| 32 | Hill        | 2016 | Barbershop Prostate Cancer Education: Factors Associated With Client Knowledge                                                                                 |
| 33 | Holt        | 2015 | Informed Decision-Making and Satisfaction with a Church-Based Men's Health Workshop Series for African-American Men: Men-Only vs. Mixed-Gender Format          |
| 34 | Horne       | 2015 | Effect of patient navigation on colorectal cancer screening in a community-based randomized controlled trial of urban African American adults                  |
| 35 | Hunt        | 2015 | Keys to the Successful Implementation of Community-Based Outreach and Navigation: Lessons from a Breast Health Navigation Program                              |
| 36 | Huntingdon  | 2016 | Toward structured peer support interventions in oncology: a qualitative insight into the experiences of gynaecological cancer survivors providing peer support |
| 37 | Jean-Pierre | 2016 | Satisfaction With Cancer Care Among Underserved Racial-Ethnic Minorities and Lower-Income Patients Receiving Patient Navigation                                |
| 38 | Kenyon      | 2015 | Life coaching following haematopoietic stem cell transplantation: a mixed-method investigation of feasibility and acceptability                                |
| 39 | Kim         | 2015 | The effects of navigation and types of neighborhoods on timely follow-up of abnormal mammogram among black women                                               |
| 40 | Ko          | 2014 | Can Patient Navigation Improve Receipt of Recommended Breast Cancer Care? Evidence From the National Patient Navigation Research Program                       |
| 41 | Ko          | 2016 | Racial and Ethnic Differences in Patient Navigation: Results From the Patient Navigation Research Program                                                      |

|    |                  |      |                                                                                                                                                         |
|----|------------------|------|---------------------------------------------------------------------------------------------------------------------------------------------------------|
| 42 | Krok-Schoen      | 2016 | Evaluating the stage of change model to a cervical cancer screening intervention among Ohio Appalachian women                                           |
| 43 | Liu              | 2015 | Using a Lay Cancer Screening Navigator to Increase Colorectal Cancer Screening Rates                                                                    |
| 44 | Lobchuk          | 2015 | A Qualitative Analysis of 'Naturalistic' Conversations in a Peer-Led Online Support Community for Lung Cancer                                           |
| 45 | Lorhan           | 2014 | The experience of people with lung cancer with a volunteer-based lay navigation intervention at an outpatient cancer center                             |
| 46 | Lu               | 2014 | Evaluating a Culturally Tailored Peer-Mentoring and Education Pilot Intervention Among Chinese Breast Cancer Survivors Using a Mixed-Methods Approach   |
| 47 | Lockett          | 2015 | Effect of Patient Navigator Program on No-Show Rates at an Academic Referral Colposcopy Clinic                                                          |
| 48 | Luque            | 2016 | Salud es Vida: a Cervical Cancer Screening Intervention for Rural Latina Immigrant Women                                                                |
| 49 | Lynch            | 2014 | A randomized controlled trial of a multiple health behavior change intervention delivered to colorectal cancer survivors: effects on sedentary behavior |
| 50 | Madore           | 2014 | Feasibility of a psychosocial and patient navigation intervention to improve access to treatment among underserved breast cancer patients               |
| 51 | Mandigo          | 2015 | Pairing community health workers with HPV self-sampling for cervical cancer prevention in rural Haiti                                                   |
| 52 | Marshall         | 2014 | Un Abrazo Para La Familia: an evidenced-based rehabilitation approach in providing cancer education to low-SES Hispanic co-survivors                    |
| 53 | Marshall         | 2016 | Effect of Patient Navigation on Breast Cancer Screening Among African American Medicare Beneficiaries: A Randomized Controlled Trial                    |
| 54 | Mayfield-Johnson | 2016 | Addressing Breast Cancer Health Disparities in the Mississippi Delta Through an Innovative Partnership for Education, Detection, and Screening          |
| 55 | Mbah             | 2015 | Mobilizing social support networks to improve cancer screening: the COACH randomized controlled trial study design                                      |

|    |            |      |                                                                                                                                                                                                                                                                               |
|----|------------|------|-------------------------------------------------------------------------------------------------------------------------------------------------------------------------------------------------------------------------------------------------------------------------------|
| 56 | McDonough  | 2016 | Mujer Sana, Familia Fuerte: The Effects of a Culturally-Relevant, Community-Based, <i>Promotores</i> Program to Increase Cervical Cancer Screening among Latinas                                                                                                              |
| 57 | Meade      | 2014 |                                                                                                                                                                                                                                                                               |
| 58 | Meghea     | 2015 | Lay navigator model for impacting cancer health disparities<br>Aligning Cost Assessment With Community-Based Participatory Research: The Kin KeeperSM Intervention                                                                                                            |
| 59 | Mens       | 2015 | Randomized psychosocial interventions for breast cancer: impact on life purpose                                                                                                                                                                                               |
| 60 | Miller     | 2015 |                                                                                                                                                                                                                                                                               |
| 61 | Mirrielees | 2015 | Bowel Prep Quality in Patients of Low Socioeconomic Status Undergoing Screening Colonoscopy With Patient Navigation<br>Breast Cancer Survivor Advocacy at a University Hospital: Development of a Peer Support Program with Evaluation by Patients, Advocates, and Clinicians |
| 62 | Mittal     | 2015 | HPV detection-based cervical cancer screening program in low-resource setting: lessons learnt from a community-based demonstration project in India                                                                                                                           |
| 63 | Mojica     | 2016 | Breast, Cervical, and Colorectal Cancer Education and Navigation: Results of a Community Health Worker Intervention                                                                                                                                                           |
| 64 | Mollica    | 2014 |                                                                                                                                                                                                                                                                               |
| 65 | Molokwu    | 2015 | Peer navigation in African American breast cancer survivors<br>Intervention on Cervical Cancer and Human Papillomavirus Knowledge Among Predominantly Hispanic Primary Care Patients on the US-Mexico Border                                                                  |
| 66 | Myers      | 2014 | Increasing Colon Cancer Screening in Primary Care Among African Americans                                                                                                                                                                                                     |
| 67 | Ngoma      | 2014 |                                                                                                                                                                                                                                                                               |
| 68 | Nguyen     | 2015 | Downstaging cancer in rural Africa<br>Effectiveness of Lay Health Worker Outreach in Reducing Disparities in Colorectal Cancer Screening in Vietnamese Americans                                                                                                              |
| 69 | Nickell    | 2014 | Educating Low-SES and LEP Survivors About Breast Cancer Research: Pilot Test of the Health Research Engagement Intervention                                                                                                                                                   |

|           |              |      |                                                                                                                                                            |
|-----------|--------------|------|------------------------------------------------------------------------------------------------------------------------------------------------------------|
| <b>70</b> | Ono          | 2016 | Subjective evaluation of a peer support program by women with breast cancer: A qualitative study                                                           |
| <b>71</b> | Oppong       | 2016 | Time to Diagnostic Evaluation After Mammographic Screening in an Urban Setting                                                                             |
| <b>72</b> | Ozier        | 2016 | A mixed method study of a peer support intervention for newly diagnosed primary brain tumour patients                                                      |
| <b>73</b> | Palomino     | 2015 | Barriers and Challenges of Cancer Patients and Their Experience with Patient Navigators in the Rural US/Mexico Border Region                               |
| <b>74</b> | Parra-Medina | 2015 | Promotora outreach, education and navigation support for HPV vaccination to Hispanic women with unvaccinated daughters                                     |
| <b>75</b> | Paskett      | 2016 | Impact of Patient Navigation Interventions on Timely Diagnostic Follow Up for Abnormal Cervical Screening                                                  |
| <b>76</b> | Pelto        | 2015 | Predicting Colonoscopy Completion among African American and Latino/a Participants in a Patient Navigation Program                                         |
| <b>77</b> | Percac-Lima  | 2015 | Patient Navigation Based on Predictive Modeling Decreases No-Show Rates in Cancer Care                                                                     |
| <b>78</b> | Percac-Lima  | 2014 | The Longitudinal Impact of Patient Navigation on Equity in Colorectal Cancer Screening in a Large Primary Care Network                                     |
| <b>79</b> | Percac-Lima  | 2015 | Patient Navigation to Improve Follow-Up of Abnormal Mammograms Among Disadvantaged Women                                                                   |
| <b>80</b> | Pinto        | 2015 | Peers Promoting Physical Activity among Breast Cancer Survivors: A Randomized Controlled Trial                                                             |
| <b>81</b> | Post         | 2015 | Effects of Patient Navigation on Patient Satisfaction Outcomes                                                                                             |
| <b>82</b> | Quintiliani  | 2015 | Patient navigation and financial incentives to promote smoking cessation in an underserved primary care population: A randomized controlled trial protocol |
| <b>83</b> | Rafie        | 2015 | Reaching Hard to Reach Populations with Hard to Communicate Messages: Efficacy of a Breast Health Research Champion Training Program                       |

|           |              |      |                                                                                                                                                         |
|-----------|--------------|------|---------------------------------------------------------------------------------------------------------------------------------------------------------|
| <b>84</b> | Ramachandran | 2015 | Multiple Barriers Delay Care Among Women with Abnormal Cancer Screening Despite Patient Navigation                                                      |
| <b>85</b> | Ramachandran | 2015 | Barriers to Health Care Contribute to Delays in Follow-Up Among Women With Abnormal Cancer Screening: Data From the Patient Navigation Research Program |
| <b>86</b> | Reiter       | 2014 | Predictors of resolution in navigated patients with abnormal cancer screening tests                                                                     |
| <b>87</b> | Risendal     | 2014 | Adaptation of the Chronic Disease Self-Management Program for Cancer Survivors: Feasibility, Acceptability, and Lessons for Implementation              |
| <b>88</b> | Scheel       | 2015 | Latinas' Mammography Following a Home-Based Promotores-Lead Intervention                                                                                |
| <b>89</b> | Schuster     | 2015 | Economic Evaluation of a Community Health Worker-Led Health Literacy Intervention to Promote Cancer Screening Among Korean American Women               |
| <b>90</b> | Shirazi      | 2015 | Targeting and Tailoring Health Communications in Breast Screening Interventions                                                                         |
| <b>91</b> | Shokar       | 2015 | Community-Based Colorectal Cancer Screening Program Targeting Low-Income Hispanics: Program Development and Costs                                       |
| <b>92</b> | Shroff       | 2014 | Feasibility of Patient Navigation in Resident Primary Care Practice                                                                                     |
| <b>93</b> | Simon        | 2015 | Evaluating a Bilingual Patient Navigation Program for Uninsured Women with Abnormal Screening Test for Breast and Cervical Cancer                       |
| <b>94</b> | Ulloa        | 2015 | Improving Breast Cancer Survivors' Knowledge Using a Patient-Centered Intervention                                                                      |
| <b>95</b> | Vallet       | 2014 | Influence of a screening navigation program on social inequalities in health beliefs about colorectal cancer screening                                  |
| <b>96</b> | Vines        | 2016 | Prostate Cancer Ambassadors                                                                                                                             |
| <b>97</b> | Wells        | 2015 | Effect of Patient Navigation on satisfaction with Cancer-Related Care                                                                                   |

|            |            |      |                                                                                                                                                      |
|------------|------------|------|------------------------------------------------------------------------------------------------------------------------------------------------------|
| <b>98</b>  | White      | 2014 | Randomized Controlled Trial of a Telephone-Based Peer-Support Program for Women Carrying a BRCA1 or BRCA2 Mutation: Impact on Psychological Distress |
| <b>99</b>  | Wilson     | 2014 | Cost-Effectiveness Analysis of a Colonoscopy Screening Navigator Program Designed for Hispanic Men                                                   |
| <b>100</b> | de la Riva | 2016 | Providers' Views on a Community-Wide Patient Navigation Program: Implications for Dissemination and Future Implementation                            |
